# Supplementary material
Source: Research Square preprint supplement (doi:10.21203/rs.3.rs-9684568/v1)
Supplement: Supplementary file 1 [file 6af2e567e708a4aa0d420eb6.docx]

**Appendix A1**. Pairwise contrasts between conditions (N–N, CCI–N, CNCI–N) across time windows in the eye-tracking analysis.

|  |  | Juhuri | | | | Russian | | | |
| --- | --- | --- | --- | --- | --- | --- | --- | --- | --- |
| Time window (ms) | **Contrast** | **Estimate** | **SE** | **z** | ***p*** | **Estimate** | **SE** | **z** | ***p*** |
| -970–0 | N-N – CCI-N | 0.095 | 0.1 | 0.93 | 0.62 | -0.095 | 0.09 | -1.1 | 0.53 |
| N-N – CNCI-N | 0.105 | 0.1 | 1.02 | 0.57 | -0.053 | 0.09 | -0.6 | 0.82 |
| CCI-N – CNCI-N | 0.009 | 0.12 | 0.08 | 1 | 0.042 | 0.1 | 0.42 | 0.91 |
| 0–500 | N-N – CCI-N | 0.076 | 0.1 | 0.76 | 0.73 | -0.155 | 0.09 | -1.8 | 0.17 |
| N-N – CNCI-N | 0.055 | 0.1 | 0.55 | 0.85 | -0.014 | 0.09 | -0.2 | 0.99 |
| CCI-N – CNCI-N | -0.021 | 0.12 | -0.2 | 0.98 | 0.142 | 0.1 | 1.42 | 0.33 |
| 500–1000 | N-N – CCI-N | 0.064 | 0.1 | 0.63 | 0.8 | -0.195 | 0.09 | -2.2 | **0.071** |
| N-N – CNCI-N | 0.023 | 0.1 | 0.23 | 0.97 | 0.012 | 0.09 | 0.13 | 0.99 |
| CCI-N – CNCI-N | -0.041 | 0.12 | -0.4 | 0.93 | 0.207 | 0.1 | 2.05 | 0.1 |
| 1000–1500 | N-N – CCI-N | 0.052 | 0.1 | 0.5 | 0.87 | -0.233 | 0.09 | -2.5 | **0.03** |
| N-N – CNCI-N | -0.008 | 0.1 | -0.1 | 1 | 0.036 | 0.09 | 0.39 | 0.92 |
| CCI-N – CNCI-N | -0.06 | 0.12 | -0.5 | 0.87 | 0.269 | 0.1 | 2.59 | **0.026** |
| 1500–2000 | N-N – CCI-N | 0.04 | 0.11 | 0.36 | 0.93 | -0.274 | 0.1 | -2.8 | **0.014** |
| N-N – CNCI-N | -0.041 | 0.11 | -0.4 | 0.92 | 0.063 | 0.1 | 0.64 | 0.8 |
| CCI-N – CNCI-N | -0.081 | 0.12 | -0.7 | 0.79 | 0.337 | 0.11 | 3.09 | **0.006** |

**Appendix A2**. Mixed-effects logistic regression model predicting overall target-looking from condition, Juhuri proficiency, and their interaction.

|  | **Juhuri** | | |
| --- | --- | --- | --- |
| *Predictors* | *Odds Ratios* | *CI* | *p* |
| (Intercept) | 1.52 | 1.15 – 2.02 | **0.003** |
| CBI-N | 0.54 | 0.43 – 0.68 | **<0.001** |
| NCBI-N | 0.56 | 0.44 – 0.70 | **<0.001** |
| JUPROF | 0.96 | 0.89 – 1.03 | 0.265 |
| CBI-N × JUPROF | 1.15 | 1.11 – 1.19 | **<0.001** |
| NCBI-N × JUPROF | 1.15 | 1.11 – 1.19 | **<0.001** |
| **Random Effects** | | | | |
| σ2 | 3.29 | | |
| τ00 Target | 0.06 | | |
| τ00 ParticipantID | 0.05 | | |
| ICC | 0.03 | | |
| N ParticipantID | 38 | | |
| N Target | 40 | | |
| Observations | 66572 | | |
| Marginal R2 / Conditional R2 | 0.003 / 0.036 | | |


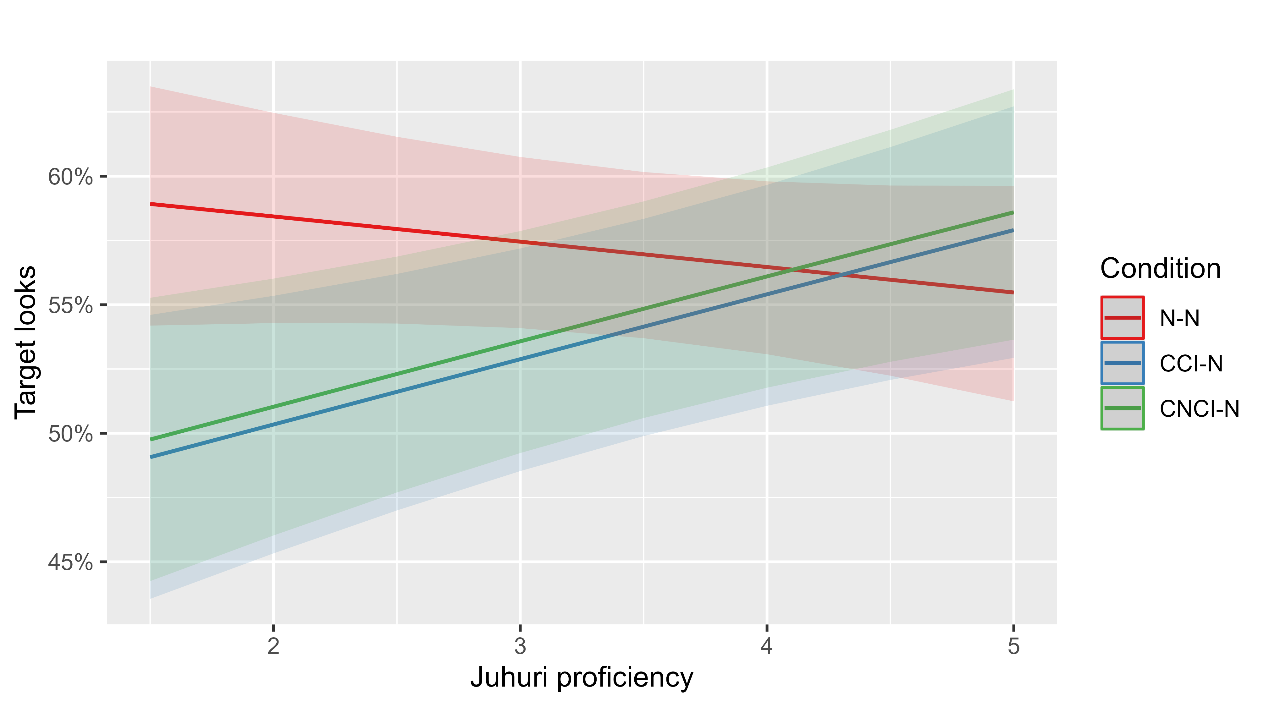


**Appendix A3**. Target looks across conditions in Juhuri as a function of proficiency.
